# Supplementary material
Source: PubMed Central journal article supplement (PMC6027642)
Supplement: NIHMS969514-supplement-supplement_1.pdf [file NIHMS969514-supplement-supplement_1.pdf]

**Supplemental Digital Content 1.** Associations between change in metabolites and change in cardiometabolic traits.

| $\Delta$ Risk Factor             | $\Delta$ Metabolite              | Beta Coefficient      | p-Value               |
|----------------------------------|----------------------------------|-----------------------|-----------------------|
| <b>CRF</b><br><b>(mL/kg/min)</b> | <i>N</i> -Acetyl-L-Glutamic Acid | -0.30                 | $5.20 \times 10^{-4}$ |
|                                  | Homogentisic Acid                | -0.29                 | $7.14 \times 10^{-4}$ |
|                                  | Kynurenic Acid                   | -0.29                 | $7.68 \times 10^{-4}$ |
|                                  | Proline                          | -0.28                 | $1.54 \times 10^{-3}$ |
|                                  | Bilirubin                        | 0.24                  | $3.63 \times 10^{-3}$ |
|                                  | Tyrosine                         | -0.25                 | $3.75 \times 10^{-3}$ |
|                                  | Malic Acid                       | 0.24                  | $4.02 \times 10^{-3}$ |
|                                  | Pyroglutamic Acid                | 0.23                  | $4.41 \times 10^{-3}$ |
|                                  | Kynurenic Acid                   | -0.24                 | $4.65 \times 10^{-3}$ |
|                                  | 1,5-Anhydroglucitol              | -0.24                 | $5.88 \times 10^{-3}$ |
|                                  | 2-Hydroxyglutaric Acid           | 0.22                  | $6.95 \times 10^{-3}$ |
|                                  | Glutamate                        | -0.24                 | $7.20 \times 10^{-3}$ |
|                                  | Ornithine                        | -0.22                 | $9.78 \times 10^{-3}$ |
|                                  | NMMA                             | -0.22                 | $1.08 \times 10^{-2}$ |
|                                  | Histidine                        | -0.22                 | $1.11 \times 10^{-2}$ |
|                                  | Alanine                          | -0.22                 | $1.13 \times 10^{-2}$ |
| ADMA/SDMA                        | -0.22                            | $1.23 \times 10^{-2}$ |                       |
| Thyroxine                        | -0.21                            | $1.26 \times 10^{-2}$ |                       |
| Methionine                       | -0.21                            | $1.39 \times 10^{-2}$ |                       |
| Citrulline                       | -0.21                            | $1.53 \times 10^{-2}$ |                       |

|               |                                  |       |                       |
|---------------|----------------------------------|-------|-----------------------|
|               | Valine                           | -0.21 | $1.93 \times 10^{-2}$ |
|               | C3-Carnitine                     | -0.20 | $2.09 \times 10^{-2}$ |
|               | Lysine                           | -0.19 | $2.10 \times 10^{-2}$ |
|               | Kynurenine                       | -0.19 | $2.76 \times 10^{-2}$ |
|               | Carnitine                        | -0.19 | $2.86 \times 10^{-2}$ |
|               | Creatine                         | -0.19 | $3.01 \times 10^{-2}$ |
|               | Oxaloacetic Acid                 | -0.18 | $3.14 \times 10^{-2}$ |
|               | Pyruvic Acid                     | -0.18 | $3.34 \times 10^{-2}$ |
|               | Xanthurenic Acid                 | -0.18 | $3.41 \times 10^{-2}$ |
|               | Glutathione Reduced              | 0.18  | $3.49 \times 10^{-2}$ |
|               | Niacinamide                      | -0.18 | $3.62 \times 10^{-2}$ |
|               | Cyclic AMP                       | -0.16 | $4.64 \times 10^{-2}$ |
|               | <i>cis/trans</i> -Hydroxyproline | -0.17 | $4.68 \times 10^{-2}$ |
|               | Glutamine                        | -0.17 | $4.78 \times 10^{-2}$ |
|               | C4-Methylmalonyl Carnitine       | -0.17 | $4.83 \times 10^{-2}$ |
| <b>Weight</b> | Proline                          | 0.27  | $1.06 \times 10^{-3}$ |
|               | Kynurenic Acid                   | 0.26  | $2.00 \times 10^{-3}$ |
|               | Pyroglutamic Acid                | -0.26 | $2.08 \times 10^{-3}$ |
|               | Methionine                       | 0.25  | $2.30 \times 10^{-3}$ |
|               | Uridine                          | 0.24  | $4.44 \times 10^{-3}$ |
|               | 3-Hydroxybutyric Acid            | -0.23 | $7.10 \times 10^{-3}$ |
|               | Niacinamide                      | 0.22  | $7.32 \times 10^{-3}$ |
|               | Creatinine                       | 0.22  | $9.25 \times 10^{-3}$ |

|  |                                  |       |                       |
|--|----------------------------------|-------|-----------------------|
|  | Leucine                          | 0.22  | $9.35 \times 10^{-3}$ |
|  | 1,5-Anhydroglucitol              | 0.22  | $9.66 \times 10^{-3}$ |
|  | Citric Acid/Isocitric Acid       | -0.21 | $1.11 \times 10^{-2}$ |
|  | C7-Carnitine                     | 0.21  | $1.11 \times 10^{-2}$ |
|  | Isoleucine                       | 0.21  | $1.13 \times 10^{-2}$ |
|  | Kynurenine                       | 0.21  | $1.15 \times 10^{-2}$ |
|  | Histidine                        | 0.21  | $1.20 \times 10^{-2}$ |
|  | Taurine                          | -0.20 | $1.65 \times 10^{-2}$ |
|  | Acetoacetic Acid                 | -0.20 | $1.89 \times 10^{-2}$ |
|  | Glycerol                         | 0.19  | $1.98 \times 10^{-2}$ |
|  | Arginine                         | 0.19  | $2.22 \times 10^{-2}$ |
|  | Thyroxine                        | 0.19  | $2.23 \times 10^{-2}$ |
|  | Glycerol-3-Phosphate             | 0.18  | $3.45 \times 10^{-2}$ |
|  | Pyruvic Acid                     | 0.18  | $3.61 \times 10^{-2}$ |
|  | Glutathione Reduced              | -0.17 | $3.92 \times 10^{-2}$ |
|  | Cyclic AMP                       | 0.17  | $4.02 \times 10^{-2}$ |
|  | Kynurenic Acid                   | 0.17  | $4.07 \times 10^{-2}$ |
|  | Oxaloacetic Acid                 | 0.17  | $4.09 \times 10^{-2}$ |
|  | C14-Carnitine                    | 0.17  | $4.18 \times 10^{-2}$ |
|  | Bilirubin                        | -0.17 | $4.35 \times 10^{-2}$ |
|  | <i>N</i> -Acetyl-L-Glutamic Acid | 0.17  | $4.37 \times 10^{-2}$ |
|  | Choline                          | 0.17  | $4.44 \times 10^{-2}$ |
|  | Serine                           | -0.17 | $4.49 \times 10^{-2}$ |

|           |                            |       |                       |
|-----------|----------------------------|-------|-----------------------|
|           | Valine                     | 0.17  | $4.80 \times 10^{-2}$ |
| <b>WC</b> | Alanine                    | 0.28  | $6.26 \times 10^{-4}$ |
|           | Kynurenic Acid             | 0.28  | $7.18 \times 10^{-4}$ |
|           | Citric Acid/Isocitric Acid | -0.27 | $9.69 \times 10^{-4}$ |
|           | Glutamate                  | 0.25  | $2.57 \times 10^{-3}$ |
|           | Proline                    | 0.24  | $3.22 \times 10^{-3}$ |
|           | Pyroglutamic Acid          | -0.24 | $3.68 \times 10^{-3}$ |
|           | Glutathione Reduced        | -0.24 | $3.72 \times 10^{-3}$ |
|           | Methionine                 | 0.23  | $4.30 \times 10^{-3}$ |
|           | Carnitine                  | 0.24  | $4.49 \times 10^{-3}$ |
|           | Leucine                    | 0.24  | $4.59 \times 10^{-3}$ |
|           | Kynurenine                 | 0.23  | $4.79 \times 10^{-3}$ |
|           | Arachidonoylglycerol       | 0.23  | $4.89 \times 10^{-3}$ |
|           | 3-Hydroxybutyric Acid      | -0.22 | $8.36 \times 10^{-3}$ |
|           | Creatinine                 | 0.22  | $8.72 \times 10^{-3}$ |
|           | Thyroxine                  | 0.21  | $9.42 \times 10^{-3}$ |
|           | Uridine                    | 0.21  | $1.19 \times 10^{-2}$ |
|           | Arginine                   | 0.21  | $1.31 \times 10^{-2}$ |
|           | Histidine                  | 0.21  | $1.37 \times 10^{-2}$ |
|           | Homogentisic Acid          | 0.20  | $1.54 \times 10^{-2}$ |
|           | Kynurenic Acid             | 0.19  | $2.16 \times 10^{-2}$ |
|           | Isoleucine                 | 0.19  | $2.33 \times 10^{-2}$ |
|           | C3-Carnitine               | 0.19  | $2.36 \times 10^{-2}$ |

|            |                             |       |                       |
|------------|-----------------------------|-------|-----------------------|
|            | NMMA                        | 0.18  | $2.70 \times 10^{-2}$ |
|            | Anthranilic-Acid            | -0.18 | $3.16 \times 10^{-2}$ |
|            | C7-Carnitine                | 0.18  | $3.23 \times 10^{-2}$ |
|            | C4-Methylmalonyl Carnitine  | 0.17  | $3.73 \times 10^{-2}$ |
|            | Oxaloacetic Acid            | 0.17  | $3.93 \times 10^{-2}$ |
|            | Glycerol-3-Phosphate        | 0.17  | $4.08 \times 10^{-2}$ |
|            | Pyruvic Acid                | 0.17  | $4.24 \times 10^{-2}$ |
|            | Serine                      | -0.17 | $4.41 \times 10^{-2}$ |
|            | Alpha-Glycerophosphocholine | 0.23  | $4.41 \times 10^{-2}$ |
|            | Maleic Acid                 | -0.17 | $4.74 \times 10^{-2}$ |
|            | Bilirubin                   | -0.16 | $4.88 \times 10^{-2}$ |
| <b>BMI</b> | Pyroglutamic Acid           | -0.28 | $4.94 \times 10^{-4}$ |
|            | Methionine                  | 0.26  | $1.05 \times 10^{-3}$ |
|            | Uridine                     | 0.23  | $4.62 \times 10^{-3}$ |
|            | 3-Hydroxybutyric Acid       | -0.23 | $5.03 \times 10^{-3}$ |
|            | Kynurenic Acid              | 0.22  | $5.90 \times 10^{-3}$ |
|            | Niacinamide                 | 0.22  | $5.95 \times 10^{-3}$ |
|            | Leucine                     | 0.22  | $6.60 \times 10^{-3}$ |
|            | Isoleucine                  | 0.22  | $6.73 \times 10^{-3}$ |
|            | Histidine                   | 0.21  | $9.87 \times 10^{-3}$ |
|            | Pyruvic Acid                | 0.21  | $1.01 \times 10^{-2}$ |
|            | Glycerol                    | 0.21  | $1.06 \times 10^{-2}$ |
|            | Acetoacetic Acid            | -0.20 | $1.23 \times 10^{-2}$ |

|                        |                                  |       |                       |
|------------------------|----------------------------------|-------|-----------------------|
|                        | Kynurenine                       | 0.20  | $1.46 \times 10^{-2}$ |
|                        | Lactic Acid                      | 0.20  | $1.48 \times 10^{-2}$ |
|                        | Taurine                          | -0.19 | $2.09 \times 10^{-2}$ |
|                        | Oxaloacetic Acid                 | 0.18  | $2.11 \times 10^{-2}$ |
|                        | C7-Carnitine                     | 0.19  | $2.26 \times 10^{-2}$ |
|                        | Creatinine                       | 0.18  | $2.37 \times 10^{-2}$ |
|                        | Glycerol-3-Phosphate             | 0.18  | $2.52 \times 10^{-2}$ |
|                        | Creatine                         | 0.18  | $2.63 \times 10^{-2}$ |
|                        | Citric Acid/Isocitric Acid       | -0.18 | $2.73 \times 10^{-2}$ |
|                        | 1,5-Anhydroglucitol              | 0.18  | $2.80 \times 10^{-2}$ |
|                        | Serine                           | -0.18 | $2.85 \times 10^{-2}$ |
|                        | Arginine                         | 0.18  | $2.87 \times 10^{-2}$ |
|                        | Orotic Acid                      | -0.18 | $3.13 \times 10^{-2}$ |
|                        | Thyroxine                        | 0.18  | $3.15 \times 10^{-2}$ |
|                        | Bilirubin                        | -0.17 | $3.17 \times 10^{-2}$ |
|                        | Valine                           | 0.18  | $3.20 \times 10^{-2}$ |
|                        | Glutathione Reduced              | -0.18 | $3.20 \times 10^{-2}$ |
|                        | Homogentisic Acid                | 0.17  | $4.16 \times 10^{-2}$ |
|                        | <i>N</i> -Acetyl-L-Glutamic Acid | 0.17  | $4.36 \times 10^{-2}$ |
|                        | Choline                          | 0.16  | $4.81 \times 10^{-2}$ |
| <b>Fasting Insulin</b> | C8-Carnitine                     | -0.33 | $6.09 \times 10^{-4}$ |
|                        | Xanthurenic Acid                 | 0.30  | $1.91 \times 10^{-3}$ |
|                        | Creatine                         | 0.30  | $1.94 \times 10^{-3}$ |

|                |                                  |       |                       |
|----------------|----------------------------------|-------|-----------------------|
|                | Valine                           | 0.30  | $2.17 \times 10^{-3}$ |
|                | C10-Carnitine                    | -0.29 | $2.58 \times 10^{-3}$ |
|                | C12-Carnitine                    | -0.29 | $2.92 \times 10^{-3}$ |
|                | ADP                              | -0.28 | $3.63 \times 10^{-3}$ |
|                | Serine                           | -0.27 | $5.19 \times 10^{-3}$ |
|                | Kynurenic Acid                   | 0.26  | $6.73 \times 10^{-3}$ |
|                | Taurocholic Acid                 | 0.26  | $8.87 \times 10^{-3}$ |
|                | C16-Carnitine                    | -0.25 | $9.21 \times 10^{-3}$ |
|                | C6-Carnitine                     | -0.25 | $1.11 \times 10^{-2}$ |
|                | Glutamate                        | 0.25  | $1.21 \times 10^{-2}$ |
|                | Glycine                          | -0.24 | $1.39 \times 10^{-2}$ |
|                | Tryptophan                       | 0.22  | $2.25 \times 10^{-2}$ |
|                | Succinic Acid/Methylmalonic Acid | -0.22 | $2.42 \times 10^{-2}$ |
|                | Thyroxine                        | 0.22  | $2.44 \times 10^{-2}$ |
|                | C3-Carnitine                     | 0.21  | $3.03 \times 10^{-2}$ |
|                | Tyrosine                         | 0.21  | $3.14 \times 10^{-2}$ |
|                | C18:1-Carnitine                  | -0.20 | $3.72 \times 10^{-2}$ |
|                | Kynurenic Acid                   | 0.20  | $3.89 \times 10^{-2}$ |
|                | Indole-3-Propanoic Acid          | -0.20 | $4.63 \times 10^{-2}$ |
|                | Cystamine                        | 0.20  | $4.71 \times 10^{-2}$ |
|                | Leucine                          | 0.19  | $4.76 \times 10^{-2}$ |
| <b>HOMA IR</b> | UDP-GlcNAc                       | 0.33  | $6.01 \times 10^{-4}$ |
|                | C8-Carnitine                     | -0.32 | $7.89 \times 10^{-4}$ |

|                    |                                  |       |                       |
|--------------------|----------------------------------|-------|-----------------------|
|                    | Creatine                         | 0.30  | $1.98 \times 10^{-3}$ |
|                    | ADP                              | -0.29 | $2.86 \times 10^{-3}$ |
|                    | C10-Carnitine                    | -0.28 | $3.20 \times 10^{-3}$ |
|                    | C12-Carnitine                    | -0.28 | $3.32 \times 10^{-3}$ |
|                    | Xanthurenic Acid                 | 0.28  | $3.49 \times 10^{-3}$ |
|                    | Glucose Fructose Galactose       | 0.27  | $5.21 \times 10^{-3}$ |
|                    | C16-Carnitine                    | -0.26 | $6.00 \times 10^{-3}$ |
|                    | Serine                           | -0.26 | $7.18 \times 10^{-3}$ |
|                    | Glycine                          | -0.26 | $7.41 \times 10^{-3}$ |
|                    | Kynurenic Acid                   | 0.26  | $7.56 \times 10^{-3}$ |
|                    | Valine                           | 0.26  | $8.23 \times 10^{-3}$ |
|                    | Glutamate                        | 0.25  | $1.09 \times 10^{-2}$ |
|                    | Taurocholic Acid                 | 0.24  | $1.42 \times 10^{-2}$ |
|                    | C6-Carnitine                     | -0.23 | $1.70 \times 10^{-2}$ |
|                    | C18:1-Carnitine                  | -0.22 | $2.18 \times 10^{-2}$ |
|                    | Succinic Acid/Methylmalonic Acid | -0.22 | $2.40 \times 10^{-2}$ |
|                    | Kynurenic Acid                   | 0.21  | $3.00 \times 10^{-2}$ |
|                    | Indole-3-Propanoic Acid          | -0.21 | $3.05 \times 10^{-2}$ |
|                    | C18:2-Carnitine                  | -0.20 | $3.28 \times 10^{-2}$ |
|                    | Thyroxine                        | 0.20  | $3.77 \times 10^{-2}$ |
|                    | 2-Hydroxybutyric Acid            | 0.20  | $4.06 \times 10^{-2}$ |
|                    | Hydroxyphenylpyruvic Acid        | 0.20  | $4.34 \times 10^{-2}$ |
| <b>Insulin AUC</b> | Kynurenic Acid                   | 0.34  | $9.36 \times 10^{-4}$ |



|                       |                            |       |                       |
|-----------------------|----------------------------|-------|-----------------------|
|                       | ADP                        | -0.33 | $1.31 \times 10^{-3}$ |
|                       | Kynurenic Acid             | 0.31  | $2.42 \times 10^{-3}$ |
|                       | Creatine                   | 0.30  | $3.16 \times 10^{-3}$ |
|                       | Alanine                    | 0.28  | $6.53 \times 10^{-3}$ |
|                       | Thyroxine                  | 0.27  | $8.34 \times 10^{-3}$ |
|                       | Glycine                    | -0.27 | $1.06 \times 10^{-2}$ |
|                       | Serine                     | -0.26 | $1.20 \times 10^{-2}$ |
|                       | Citric Acid/Isocitric Acid | -0.26 | $1.26 \times 10^{-2}$ |
|                       | 2-Hydroxybutyric Acid      | 0.26  | $1.29 \times 10^{-2}$ |
|                       | Aspartate                  | 0.24  | $1.79 \times 10^{-2}$ |
|                       | Indole-3-Propanoic Acid    | -0.24 | $1.80 \times 10^{-2}$ |
|                       | Valine                     | 0.24  | $2.08 \times 10^{-2}$ |
|                       | Glutathione Reduced        | -0.23 | $2.38 \times 10^{-2}$ |
|                       | Methionine                 | 0.22  | $3.66 \times 10^{-2}$ |
|                       | Indoxyl Sulfate            | 0.21  | $3.80 \times 10^{-2}$ |
|                       | Leucine                    | 0.21  | $4.06 \times 10^{-2}$ |
|                       | Choline                    | 0.21  | $4.30 \times 10^{-2}$ |
| <b>2-Hour Glucose</b> | Glycerol                   | 0.25  | $5.25 \times 10^{-3}$ |
|                       | C7-Carnitine               | 0.23  | $1.10 \times 10^{-2}$ |
|                       | Inosine                    | -0.22 | $1.35 \times 10^{-2}$ |
|                       | Kynurenine                 | -0.22 | $1.60 \times 10^{-2}$ |
|                       | Thyroxine                  | 0.22  | $1.62 \times 10^{-2}$ |
|                       | C14-Carnitine              | 0.22  | $1.64 \times 10^{-2}$ |

|            |                                 |       |                       |
|------------|---------------------------------|-------|-----------------------|
|            | Indole-3-Propanoic Acid         | -0.21 | $1.95 \times 10^{-2}$ |
|            | C2-Carnitine                    | 0.21  | $2.04 \times 10^{-2}$ |
|            | Anandamide                      | 0.21  | $2.30 \times 10^{-2}$ |
|            | Xanthosine                      | -0.20 | $2.33 \times 10^{-2}$ |
|            | 2-Hydroxybutyric Acid           | 0.20  | $2.84 \times 10^{-2}$ |
|            | C6-Carnitine                    | 0.19  | $3.34 \times 10^{-2}$ |
|            | Malic Acid                      | -0.19 | $3.51 \times 10^{-2}$ |
|            | 3-Hydroxybutyric Acid           | 0.19  | $3.69 \times 10^{-2}$ |
|            | 2-Amino adipic Acid             | 0.19  | $3.86 \times 10^{-2}$ |
|            | Leucine                         | 0.19  | $3.96 \times 10^{-2}$ |
|            | Phosphocholine                  | 0.18  | $4.26 \times 10^{-2}$ |
|            | Quinolinic Acid                 | -0.18 | $4.97 \times 10^{-2}$ |
| <b>SBP</b> | Thymidine                       | 0.22  | $9.30 \times 10^{-3}$ |
|            | Cysteamine                      | 0.21  | $1.26 \times 10^{-2}$ |
|            | Taurine                         | -0.21 | $1.37 \times 10^{-2}$ |
|            | Trimethylamine- <i>N</i> -Oxide | 0.20  | $1.52 \times 10^{-2}$ |
|            | Citric Acid/Isocitric Acid      | -0.20 | $1.96 \times 10^{-2}$ |
|            | Anthranilic Acid                | -0.19 | $2.36 \times 10^{-2}$ |
|            | 1,5-Anhydroglucitol             | 0.17  | $4.80 \times 10^{-2}$ |
| <b>DBP</b> | Taurine                         | -0.20 | $2.03 \times 10^{-2}$ |
|            | Aminoisobutyric Acid            | -0.17 | $4.81 \times 10^{-2}$ |

AUC, area under the curve; SBP, systolic blood pressure; DBP, diastolic blood pressure; WC, waist circumference; CRF, cardiorespiratory fitness. Multiple regression adjusted for age, sex and baseline risk factor.

**Supplemental Digital Content 2.** Associations between baseline metabolites and change in cardiometabolic risk factors.

| $\Delta$ Risk Factor          | Metabolite                  | Beta Coefficient | p-Value               |                       |
|-------------------------------|-----------------------------|------------------|-----------------------|-----------------------|
| <b>CRF</b><br><br>(mL/kg/min) | Cyclic AMP                  | 0.26             | $6.77 \times 10^{-4}$ |                       |
|                               | ADMA/SDMA                   | 0.26             | $9.93 \times 10^{-4}$ |                       |
|                               | Glycerol-3-Phosphate        | 0.25             | $2.37 \times 10^{-3}$ |                       |
|                               | Cytidine                    | -0.21            | $1.05 \times 10^{-2}$ |                       |
|                               | Taurine                     | 0.21             | $1.15 \times 10^{-2}$ |                       |
|                               | Citric Acid/Isocitric Acid  | -0.18            | $2.18 \times 10^{-2}$ |                       |
|                               | Taurine                     | 0.19             | $2.46 \times 10^{-2}$ |                       |
|                               | Alpha-Glycerophosphocholine | 0.24             | $2.93 \times 10^{-2}$ |                       |
|                               | C26-Carnitine               | 0.18             | $3.47 \times 10^{-2}$ |                       |
|                               | AMP                         | 0.16             | $3.75 \times 10^{-2}$ |                       |
|                               | NMMA                        | 0.16             | $3.97 \times 10^{-2}$ |                       |
|                               | <b>WC</b>                   | Taurine          | -0.25                 | $1.15 \times 10^{-3}$ |
|                               |                             | Cyclic AMP       | -0.20                 | $7.09 \times 10^{-3}$ |
| Citric Acid/Isocitric Acid    |                             | 0.202            | $8.04 \times 10^{-3}$ |                       |
| ADMA/SDMA                     |                             | -0.16            | $3.46 \times 10^{-2}$ |                       |
| ADP                           |                             | -0.15            | $4.90 \times 10^{-2}$ |                       |
| <b>BMI</b>                    | Uridine                     | -0.19            | $1.25 \times 10^{-2}$ |                       |
|                               | Taurine                     | -0.19            | $1.52 \times 10^{-2}$ |                       |

|                        |                       |       |                       |
|------------------------|-----------------------|-------|-----------------------|
|                        | Cyclic AMP            | -0.18 | $2.28 \times 10^{-2}$ |
|                        | D-Gluconic Acid       | -0.18 | $3.82 \times 10^{-2}$ |
|                        | Alanine               | -0.16 | $3.83 \times 10^{-2}$ |
| <b>Fasting Insulin</b> | Deoxycholic Acid      | 0.17  | $6.79 \times 10^{-3}$ |
|                        | UDP-Glucose/Galactose | 0.15  | $2.00 \times 10^{-2}$ |
|                        | Malonic Acid          | -0.14 | $2.85 \times 10^{-2}$ |
|                        | 2-Aminoadipic Acid    | 0.14  | $2.89 \times 10^{-2}$ |
|                        | Taurine               | -0.14 | $3.37 \times 10^{-2}$ |
|                        | Allantoin             | -0.14 | $3.46 \times 10^{-2}$ |
|                        | Oxaloacetic Acid      | -0.14 | $3.70 \times 10^{-2}$ |
|                        | C5-Valeryl Carnitines | 0.15  | $4.09 \times 10^{-2}$ |
|                        | Phosphocreatine       | 0.13  | $4.32 \times 10^{-2}$ |
|                        | C26-Carnitine         | -0.13 | $4.49 \times 10^{-2}$ |
|                        | Taurine               | -0.13 | $4.84 \times 10^{-2}$ |
| <b>HOMA IR</b>         | Deoxycholic Acid      | 0.17  | $8.43 \times 10^{-3}$ |
|                        | Allantoin             | -0.17 | $1.32 \times 10^{-2}$ |
|                        | C26-Carnitine         | -0.17 | $1.41 \times 10^{-2}$ |
|                        | UDP-Glucose/Galactose | 0.14  | $3.51 \times 10^{-2}$ |
|                        | Taurine               | -0.14 | $3.54 \times 10^{-2}$ |
|                        | Malonic Acid          | -0.14 | $3.71 \times 10^{-2}$ |
|                        | Phosphocreatine       | 0.13  | $3.75 \times 10^{-2}$ |
|                        | Oxaloacetic Acid      | -0.14 | $3.87 \times 10^{-2}$ |

|                       |                                  |       |                       |
|-----------------------|----------------------------------|-------|-----------------------|
|                       | C5-Valeryl Carnitines            | 0.14  | $4.72 \times 10^{-2}$ |
|                       | 2-Aminoadipic Acid               | 0.13  | $4.76 \times 10^{-2}$ |
| <b>Insulin AUC</b>    | Taurine                          | -0.20 | $1.72 \times 10^{-3}$ |
|                       | Allantoin                        | -0.19 | $2.97 \times 10^{-3}$ |
|                       | Pseudouridine                    | -0.18 | $4.23 \times 10^{-3}$ |
|                       | Arginine                         | -0.15 | $1.36 \times 10^{-2}$ |
|                       | ADMA/SDMA                        | -0.15 | $1.42 \times 10^{-2}$ |
|                       | Dimethylglycine                  | -0.15 | $1.53 \times 10^{-2}$ |
|                       | Choline                          | -0.14 | $2.45 \times 10^{-2}$ |
|                       | Creatinine                       | -0.15 | $2.91 \times 10^{-2}$ |
|                       | Kynurenic Acid                   | -0.14 | $2.93 \times 10^{-2}$ |
|                       | Glyceric Acid                    | -0.13 | $3.01 \times 10^{-2}$ |
|                       | NMMA                             | -0.13 | $3.56 \times 10^{-2}$ |
|                       | <i>cis/trans</i> -Hydroxyproline | -0.13 | $4.45 \times 10^{-2}$ |
|                       | Homocysteine                     | -0.13 | $4.47 \times 10^{-2}$ |
|                       | Citrulline                       | -0.13 | $4.64 \times 10^{-2}$ |
|                       | Phosphocholine                   | -0.12 | $4.72 \times 10^{-2}$ |
| <b>2-Hour Glucose</b> | <i>cis/trans</i> -Hydroxyproline | -0.22 | $1.17 \times 10^{-3}$ |
|                       | Hippuric Acid                    | -0.22 | $1.88 \times 10^{-3}$ |
|                       | C10-Carnitine                    | -0.21 | $1.96 \times 10^{-3}$ |
|                       | C7-Carnitine                     | -0.22 | $2.09 \times 10^{-3}$ |
|                       | Creatinine                       | -0.24 | $2.16 \times 10^{-3}$ |
|                       | C8-Carnitine                     | -0.20 | $3.12 \times 10^{-3}$ |

|  |                                             |       |                       |
|--|---------------------------------------------|-------|-----------------------|
|  | Uric Acid                                   | 0.23  | $3.68 \times 10^{-3}$ |
|  | C14-Carnitine                               | -0.20 | $4.53 \times 10^{-3}$ |
|  | Citrulline                                  | -0.19 | $5.65 \times 10^{-3}$ |
|  | C18-Carnitine                               | -0.21 | $5.68 \times 10^{-3}$ |
|  | Taurine                                     | -0.19 | $6.73 \times 10^{-3}$ |
|  | C12-Carnitine                               | -0.19 | $7.33 \times 10^{-3}$ |
|  | Glucose/Fructose/Galactose                  | 0.18  | $9.98 \times 10^{-3}$ |
|  | C6-Carnitine                                | -0.18 | $1.15 \times 10^{-2}$ |
|  | C5-Glutaryl Carnitine                       | -0.16 | $1.86 \times 10^{-2}$ |
|  | Histidine                                   | -0.16 | $1.95 \times 10^{-2}$ |
|  | Hypoxanthine                                | 0.16  | $2.31 \times 10^{-2}$ |
|  | C26-Carnitine                               | -0.16 | $2.38 \times 10^{-2}$ |
|  | Inosine                                     | 0.16  | $2.56 \times 10^{-2}$ |
|  | C16-Carnitine                               | -0.17 | $2.59 \times 10^{-2}$ |
|  | Choline                                     | -0.16 | $2.74 \times 10^{-2}$ |
|  | Phosphocholine                              | -0.15 | $3.25 \times 10^{-2}$ |
|  | Keto Isocaproic Acid/Keto<br>Methylvalerate | 0.16  | $3.44 \times 10^{-2}$ |
|  | Allantoin                                   | -0.15 | $3.68 \times 10^{-2}$ |
|  | 2-Ketoisovaleric Acid                       | 0.15  | $3.91 \times 10^{-2}$ |
|  | Dimethylglycine                             | -0.14 | $4.41 \times 10^{-2}$ |
|  | Glyceric Acid                               | -0.14 | $4.69 \times 10^{-2}$ |
|  | Xanthosine                                  | 0.14  | $4.77 \times 10^{-2}$ |

|            |                         |       |                       |
|------------|-------------------------|-------|-----------------------|
|            | Glycine                 | -0.15 | $4.82 \times 10^{-2}$ |
| <b>SBP</b> | Quinolinic Acid         | 0.21  | $6.34 \times 10^{-3}$ |
|            | 2-Hydroxyglutaric Acid  | 0.21  | $6.83 \times 10^{-3}$ |
|            | Anthranilic Acid        | 0.20  | $8.66 \times 10^{-3}$ |
|            | Thiamine                | 0.18  | $1.54 \times 10^{-2}$ |
|            | 2-Amino adipic Acid     | -0.19 | $1.68 \times 10^{-2}$ |
|            | Malonic Acid            | 0.18  | $2.01 \times 10^{-2}$ |
|            | C9-Carnitine            | -0.17 | $2.69 \times 10^{-2}$ |
|            | C4-Butyryl Carnitines   | 0.17  | $2.77 \times 10^{-2}$ |
|            | Oxalic Acid             | -0.17 | $3.20 \times 10^{-2}$ |
|            | Kynurenine              | 0.17  | $3.31 \times 10^{-2}$ |
|            | Homocysteine            | -0.16 | $3.47 \times 10^{-2}$ |
|            | Glutamate               | 0.17  | $4.26 \times 10^{-2}$ |
|            | Kynurenine              | 0.16  | $4.47 \times 10^{-2}$ |
| <b>DBP</b> | Glutamate               | 0.29  | $2.49 \times 10^{-4}$ |
|            | Thiamine                | 0.22  | $2.82 \times 10^{-3}$ |
|            | Uracil                  | 0.22  | $3.10 \times 10^{-3}$ |
|            | Homogentisic Acid       | 0.21  | $4.70 \times 10^{-3}$ |
|            | Pyruvic Acid            | 0.19  | $7.54 \times 10^{-3}$ |
|            | Alpha-Ketoglutaric Acid | 0.19  | $9.83 \times 10^{-3}$ |
|            | Quinolinic Acid         | 0.19  | $1.08 \times 10^{-2}$ |
|            | C9-Carnitine            | -0.18 | $1.42 \times 10^{-2}$ |
|            | C10-Carnitine           | -0.17 | $1.79 \times 10^{-2}$ |

|  |                               |       |                       |
|--|-------------------------------|-------|-----------------------|
|  | Homocysteine                  | -0.17 | $1.98 \times 10^{-2}$ |
|  | Tyrosine                      | 0.17  | $2.46 \times 10^{-2}$ |
|  | Phosphocreatine               | -0.16 | $2.84 \times 10^{-2}$ |
|  | 2-Aminoadipic Acid            | -0.16 | $3.89 \times 10^{-2}$ |
|  | Oxalic Acid                   | -0.15 | $4.42 \times 10^{-2}$ |
|  | Niacinamide                   | 0.14  | $4.79 \times 10^{-2}$ |
|  | Glycochenodeoxycholic<br>Acid | 0.15  | $4.79 \times 10^{-2}$ |

AUC, area under the curve; SBP, systolic blood pressure; DBP, diastolic blood pressure; WC, waist circumference; CRF, cardiorespiratory fitness. Multiple regression adjusted for age, sex and baseline risk factor.
